# Supplementary material
Source: publisher figshare collection journal article supplement (https://acs.figshare.com/ndownloader/files/4166404)
Supplement: Supplementary file 1 [file 4166404]

# Supporting Information

## First-principles assessment of the reactions of boric acid on NiO (001) and ZrO<sub>2</sub> ( $\bar{1}11$ ) surfaces

Priyank V. Kumar,<sup>1</sup> Michael P. Short,<sup>2</sup> Sidney Yip,<sup>2</sup> Bilge Yildiz,<sup>2,\*</sup> and Jeffrey C.  
Grossman<sup>1,\*</sup>

<sup>1</sup>Department of Materials Science and Engineering, Massachusetts Institute of Technology, Cambridge

<sup>2</sup>Nuclear Science and Engineering, Massachusetts Institute of Technology, Cambridge

\*To whom correspondence should be addressed

[byildiz@mit.edu](mailto:byildiz@mit.edu)

[jcg@mit.edu](mailto:jcg@mit.edu)

### 1. Calculated bulk properties of NiO and ZrO<sub>2</sub>

**Table S1** : Lattice parameter ( $a$ ), magnetic moment ( $m$ ), bulk modulus ( $B$ ) and band gap ( $\Delta\epsilon$ ) of NiO.

|                                    | <b>Present<br/>work</b> | <b>Calc.</b> <sup>[S1]</sup> | <b>Exp.</b>                                 |
|------------------------------------|-------------------------|------------------------------|---------------------------------------------|
| $a$ (Å)                            | 4.19                    | 4.20                         | 4.17 <sup>[S2]</sup>                        |
| Magnetic moment<br>$m$ ( $\mu_B$ ) | 1.68                    | 1.72                         | 1.67 <sup>[S3]</sup> , 1.77 <sup>[S4]</sup> |
| $B$ (GPa)                          | 186.1                   | 202.5                        | 205 <sup>[S2]</sup>                         |
| $\Delta\epsilon$ (eV)              | 3.16                    | 3.20                         | 4.2 <sup>[S2]</sup>                         |

**Table S2** : Structural properties of ZrO<sub>2</sub> (Monoclinic C<sub>2h</sub><sup>5</sup>) in the Wyckoff coordinates:  $\pm(x, y, z)$  and  $\pm(x, 1/2 - y, 1/2 + z)$

|                        | <b>Present work</b> | <b>Calc.</b> <sup>[S5]</sup> | <b>Exp.</b> <sup>[S6]</sup> |
|------------------------|---------------------|------------------------------|-----------------------------|
| <i>a</i> (Å)           | 5.199               | 5.192                        | 5.150                       |
| <i>b/a</i>             | 1.013               | 1.012                        | 1.012                       |
| <i>c/a</i>             | 1.032               | 1.032                        | 1.032                       |
| $\gamma$ (deg.)        | 99.23               | 99.23                        | 99.23                       |
| <i>x</i> <sub>Zr</sub> | 0.277               | 0.277                        | 0.276                       |
| <i>y</i> <sub>Zr</sub> | 0.044               | 0.042                        | 0.040                       |
| <i>z</i> <sub>Zr</sub> | 0.210               | 0.210                        | 0.209                       |
| <i>x</i> <sub>O1</sub> | 0.071               | 0.071                        | 0.069                       |
| <i>y</i> <sub>O1</sub> | 0.336               | 0.336                        | 0.342                       |
| <i>z</i> <sub>O1</sub> | 0.342               | 0.341                        | 0.345                       |
| <i>x</i> <sub>O2</sub> | 0.449               | 0.448                        | 0.451                       |
| <i>y</i> <sub>O2</sub> | 0.758               | 0.757                        | 0.758                       |
| <i>z</i> <sub>O2</sub> | 0.479               | 0.479                        | 0.479                       |

## 2. Tilting of B(OH)<sub>3</sub> on NiO (001) surface

DFT calculations were performed to understand the orientation dependence of the boric acid molecule on the NiO (001) surface. Calculations were performed to explore angles in the range -90° to 90°, from the normal to the surface. The interval was chosen to be 10°. A plot showing the variation of adsorption energy with orientation is shown in Figure S1. Calculations show that, indeed for a molecule to orient at different angles to the normal, the energy penalty is quite small and the molecule can explore these

orientations at higher temperatures. The most stable orientation is seen around  $-20^\circ$  from the normal.

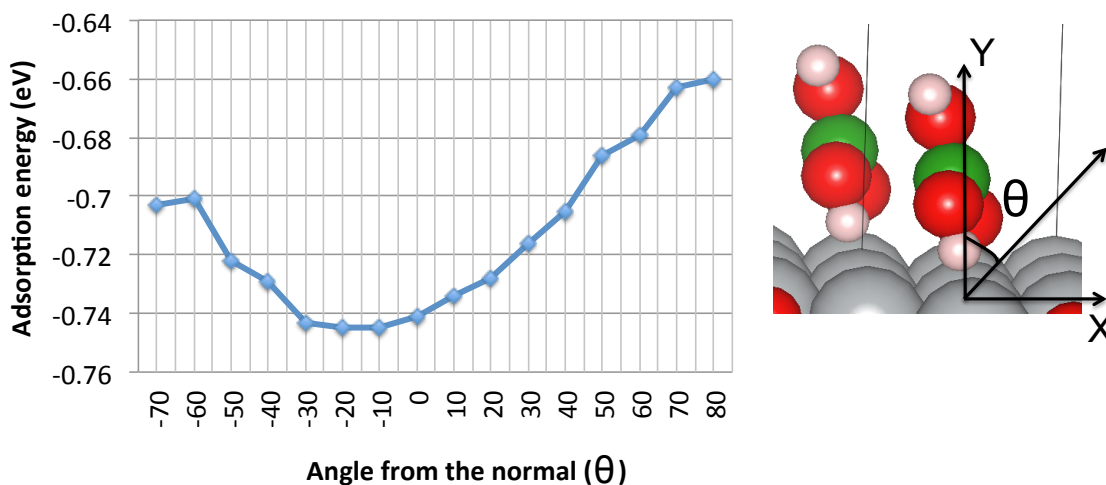

**Figure S1** : Variation of the adsorption energy of  $B(OH)_3$  on  $NiO$  (001) with orientation of the adsorbed molecule.

### 3. Additional adsorption configurations of $B(OH)_3$ on $ZrO_2$ ( $\bar{1}11$ )

Here, we present additional adsorption configurations of  $B(OH)_3$  on  $ZrO_2$  ( $\bar{1}11$ ) as shown in Table S3. The molecular and dissociated adsorption configurations are seen to be metastable and hence are likely to be observed. In addition to the exothermic structure reported in the paper for the  $H_2O$  elimination reaction, several other structures were observed. However, these are found to be unfavorable with adsorption energy values of 0.46 and 1.75 eV.

| Structure                                                                        | Adsorption mode              | Adsorption energy (eV) |
|----------------------------------------------------------------------------------|------------------------------|------------------------|
| O <sub>5</sub> ...(HO)B(OH)(HO)-Zr <sub>2</sub>                                  | Molecular (trans)            | -0.68                  |
| Zr <sub>1</sub> -(OH)B(OH)(HO)-Zr <sub>3</sub>                                   | Molecular (cis)              | -0.70                  |
| Zr <sub>2</sub> -OB(OH)(HO)-Zr <sub>3</sub> + O <sub>6</sub> -H                  | Single O-H dissociated       | -1.03                  |
| Zr <sub>1</sub> -OB(OH)(HO)-Zr <sub>3</sub> + O <sub>5</sub> -H                  | Single O-H dissociated       | -1.50                  |
| Zr <sub>2</sub> -OB(OH)O-Zr <sub>3</sub> + O <sub>5</sub> -H + O <sub>1</sub> -H | Double O-H dissociated       | -1.24                  |
| Zr <sub>2</sub> -OB(OH)O-Zr <sub>3</sub> + O <sub>5</sub> -H + O <sub>3</sub> -H | Double O-H dissociated       | -1.41                  |
| Zr <sub>3</sub> -OBO + O <sub>5</sub> -H + H <sub>2</sub> O                      | H <sub>2</sub> O elimination | 0.46                   |
| OB(OH)...O <sub>5</sub> + H <sub>2</sub> O                                       | H <sub>2</sub> O elimination | 1.75                   |

**Table S3** : Additional adsorption configurations, the corresponding adsorption mode and energy for B(OH)<sub>3</sub> on ZrO<sub>2</sub> ( $\bar{1}11$ ).

## References

- [S1] Rohrbach, A.; Hafner, J.; Kresse, G. Phys. Rev. B 2004, 69, 075413.
- [S2] Sawatzky, G. A.; Allen, J. W. Phys. Rev. Lett. 1984, 53, 2339–2342.
- [S3] Fender, B. E. F.; Jacobson, A. J.; Wedgwood, F. A. J. Chem. Phys. 1968, 48, 990.
- [S4] Cheetham, A. K.; Hope, D. A. O. Phys. Rev. B 1983, 27, 6964–6967.
- [S5] Jomard, G.; Petit, T.; Pasturel, A.; Magaud, L.; Kresse, G.; Hafner, J. Phys. Rev. B 1999, 59, 4044–4052.
- [S6] Aldebert, P.; Traverse, J.-P. Journal of the American Ceramic Society 1985, 68, 34–40.
